# Supplementary material
Source: PubMed Central journal article supplement (PMC10077106)
Supplement: jamapsychiatry-e224786-s001.pdf [file jamapsychiatry-e224786-s001.pdf]

## Supplementary Online Content

Isung J, Isomura K, Williams K, et al. Association of primary immunodeficiencies in parents with psychiatric disorders and suicidal behavior in their offspring: a Swedish population-based study. *JAMA Psychiatry*. Published online February 1, 2023. doi:10.1001/jamapsychiatry.2022.4786

**eTable 1.** List of Swedish International Classification of Diseases (ICD) Codes to Collect Records of Primary Antibody Immunodeficiencies From the National Patient Register

**eTable 2.** List of Swedish International Classification of Diseases (ICD) Codes to Collect Records of Psychiatric Disorders From the National Patient Register

**eTable 3.** List of Swedish International Classification of Diseases (ICD) Codes to Define Suicidal Behavior From the National Patient Register and the Cause of Death Register

**eTable 4.** List of Swedish International Classification of Diseases (ICD) Codes to Collect Records of Autoimmune Diseases From the National Patient Register

**eTable 5.** Risk of Psychiatric Disorders and Suicidal Behavior in Offspring of Fathers With Primary Immunodeficiencies

**eTable 6.** Risk of Psychiatric Disorders and Suicidal Behavior in Offspring of Mothers With Primary Immunodeficiencies in a Sub-cohort of Individuals Born in 1973 or Later

**eTable 7.** Risk of Psychiatric Disorders and Suicidal Behavior in Offspring of Fathers With Primary Immunodeficiencies in a Sub-cohort of Individuals Born in 1973 or Later

**eTable 8.** Risk of Psychiatric Disorders and Suicidal Behavior in Offspring of Fathers With Primary Immunodeficiencies, Only Autoimmune Disease, or Both

**eTable 9.** Risk of Psychiatric Disorders and Suicidal Behavior in Offspring of Mothers With Primary Immunodeficiencies, Excluding Offspring With Own Record of Primary Immunodeficiency

**eTable 10.** Risk of Psychiatric Disorders and Suicidal Behavior in Offspring of Mothers With Primary Immunodeficiencies, Excluding Offspring With Own Record of Autoimmune Disease

**eTable 11.** Risk of Psychiatric Disorders and Suicidal Behavior in Offspring of Mothers With Primary Immunodeficiencies, Excluding Offspring With Own Record of Primary Immunodeficiency and Autoimmune Disease

**eTable 12.** Risk of Psychiatric Disorders and Suicidal Behavior in Offspring of Fathers With Primary Immunodeficiencies, Excluding Offspring With Own Record of Primary Immunodeficiency

**eTable 13.** Risk of Psychiatric Disorders and Suicidal Behavior in Offspring of Fathers With Primary Immunodeficiencies, Excluding Offspring With Own Record of Autoimmune Disease

**eTable 14.** Risk of Psychiatric Disorders and Suicidal Behavior in Offspring of Fathers With Primary Immunodeficiencies, Excluding Offspring With Own Record of Primary Immunodeficiency and Autoimmune Disease

**eReferences.**

This supplementary material has been provided by the authors to give readers additional information about their work.

**eTable 1.** List of Swedish International Classification of Diseases (ICD) Codes to Collect Records of Primary Antibody Immunodeficiencies From the National Patient Register

| <b>Diagnoses</b>                                                                                                                                                                                                           | <b>ICD-8 codes</b>  | <b>ICD-9 codes</b> | <b>ICD-10 codes</b> | <b>PID n=8 378 (%)<sup>b</sup></b> |
|----------------------------------------------------------------------------------------------------------------------------------------------------------------------------------------------------------------------------|---------------------|--------------------|---------------------|------------------------------------|
| Hypogammaglobulinaemia                                                                                                                                                                                                     | 275,10 <sup>a</sup> |                    |                     | 744 (8.88)                         |
| <u>Primary deficiencies of humoral immunity</u><br>Agammaglobulinemia<br>Hypogammaglobulinemia<br>Common variable immunodeficiency<br>Selective deficiency of immunoglobulin A<br>Selective deficiency of immunoglobulin G |                     | 279J <sup>a</sup>  |                     | 1 469 (17.53)                      |
| Hereditary hypogammaglobulinemia                                                                                                                                                                                           |                     |                    | D80.0               | 2 244 (26.78)                      |
| Nonfamilial hypogammaglobulinemia                                                                                                                                                                                          |                     |                    | D80.1               | 3 519 (42.00)                      |
| Selective deficiency of immunoglobulin A [IgA]                                                                                                                                                                             |                     |                    | D80.2               | 4 050 (48.34)                      |
| Selective deficiency of immunoglobulin G [IgG] subclasses                                                                                                                                                                  |                     |                    | D80.3               | 4 786 (57.13)                      |
| Selective deficiency of immunoglobulin M [IgM]                                                                                                                                                                             |                     |                    | D80.4               | 2 096 (25.02)                      |
| Immunodeficiency with increased immunoglobulin M [IgM]                                                                                                                                                                     |                     |                    | D80.5               | 57 (0.68)                          |
| Common variable immunodeficiency with predominant abnormalities of B-cell numbers and function                                                                                                                             |                     |                    | D83.0               | 2 317 (27.66)                      |
| Common variable immunodeficiency with predominant immunoregulatory T-cell disorders                                                                                                                                        |                     |                    | D83.1               | 139 (1.66)                         |
| Common variable immunodeficiency with autoantibodies to B- or T-cells                                                                                                                                                      |                     |                    | D83.2               | 2 037 (24.31)                      |
| Other common variable immunodeficiency                                                                                                                                                                                     |                     |                    | D83.8               | 2 130 (25.42)                      |
| Common variable immunodeficiency, unspecified                                                                                                                                                                              |                     |                    | D83.9               | 2 405 (28.71)                      |

<sup>a</sup> In ICD-8 and 9 there was only one diagnostic code representing primary deficiencies of humoral immunity.

<sup>b</sup> Individual ICD-codes for subtypes of primary immunodeficiency (PID) could only be ascertained in ICD-10. The sum of individuals with a specific PID diagnosis may exceed the total number of PID individuals since patients could have more than one code in the register.

**eTable 2.** List of Swedish International Classification of Diseases (ICD) Codes to Collect records of Psychiatric Disorders From the National Patient Register

| <b>Diagnoses</b>                                                                                                                                                                                                                                            | <b>ICD-8 codes</b>                                              | <b>ICD-9 codes</b>                                             | <b>ICD-10 codes</b>                                                                                    | <b>Age constrains</b>               |
|-------------------------------------------------------------------------------------------------------------------------------------------------------------------------------------------------------------------------------------------------------------|-----------------------------------------------------------------|----------------------------------------------------------------|--------------------------------------------------------------------------------------------------------|-------------------------------------|
| Autism spectrum disorders                                                                                                                                                                                                                                   | -                                                               | 299A                                                           | F84.0, F84.1, F84.8, F84.9                                                                             | If recorded at age $\geq 1$ year    |
| Attention-deficit/hyperactivity disorder<br><br>Diagnosis defined through both ICD-code or prescription of ADHD drugs <sup>a</sup> as recorded in the Prescribed Drug Register. The validity of this definition has been previously described. <sup>1</sup> | -                                                               | 314W, 314X                                                     | F90<br><br>Prescribed Drug Register codes: <sup>a</sup><br>N06BA01, N06BA02, N06BA04, N06BA09, N06BA12 | If recorded at age $\geq 3$ years   |
| Tourette's and chronic tic disorders                                                                                                                                                                                                                        | 306.2 following the algorithm described elsewhere. <sup>2</sup> | 307C following the algorithm described elsewhere. <sup>2</sup> | F95.1, F95.2 following the algorithm described elsewhere. <sup>2</sup>                                 | If recorded at age $\geq 3$ years   |
| Obsessive-compulsive disorder                                                                                                                                                                                                                               | 300.3                                                           | 300D                                                           | F42                                                                                                    | If recorded at age 6 years or above |
| Eating disorders                                                                                                                                                                                                                                            | -                                                               | 307B, 307F                                                     | F50.0/.1/.2/.3/.8/.9                                                                                   | If recorded at age $\geq 8$ years   |
| Schizophrenia and other psychotic disorders                                                                                                                                                                                                                 | 291, 295, 296.99, 297, 298, 299                                 | 291, 292, 295, 296X, 297, 298, 299 (except for 299A)           | F10-F19 subsection .5, F20, F21, F22, F23, F24, F25, F28, F29, F32.3                                   | If recorded at age $\geq 10$ years  |

|                                                    |                              |                           |                                            |                                    |
|----------------------------------------------------|------------------------------|---------------------------|--------------------------------------------|------------------------------------|
| Bipolar disorders                                  | 296, except 296.2 and 296.99 | 296, except 296B and 296X | F30, F31                                   | If recorded at age $\geq$ 10 years |
| Anxiety and stress-related disorders               | 3000, 3002, 307, 3084        | 300A, 300C, 308,309       | F40.0, F40.1, F41.1, F43                   | If recorded at age $\geq$ 6 years  |
| Major depression disorder and other mood disorders | 296.2, 300.4                 | 296B, 300E, 311           | F32 (except for F32.3), F33, F34, F38, F39 | If recorded at age $\geq$ 10 years |
| Substance use disorders                            | 303, 304                     | 303, 304, 305A, 305X      | F10-F19 (except subsection .5)             | If recorded at age $\geq$ 10 years |

<sup>a</sup> In the Prescribed Drug Register, drug classes are defined following the Anatomical Therapeutic Chemical (ATC) classification system codes.

**eTable 3.** List of Swedish International Classification of Diseases (ICD) Codes to Define Suicidal Behavior From the National Patient Register and the Cause of Death Register<sup>b</sup>

| Diagnoses <sup>c</sup>                                        | ICD codes <sup>a</sup>                                          |
|---------------------------------------------------------------|-----------------------------------------------------------------|
| Suicide and self-inflicted injury                             | E950-E959 (ICD-8 and ICD-9), if recorded at age $\geq 10$ years |
| Intentional self-harm                                         | X60-X84 (ICD-10), if recorded at age $\geq 10$ years            |
| Injury undetermined whether accidental or purposely inflicted | E980-E989 (ICD-8 and ICD-9), if recorded at age $\geq 10$ years |
| Events of undetermined intent                                 | Y10-Y34 (ICD-10), if recorded at age $\geq 10$ years            |

<sup>a</sup> Diagnoses of suicide attempts were retrieved from the National Patient Register and were coded according to the Swedish version of ICD-codes in its 8<sup>th</sup>, 9<sup>th</sup>, or 10<sup>th</sup> revision.

<sup>b</sup> Diagnoses of death by suicide were retrieved from the Cause of Death Register using the same codes as for suicide attempts and were coded according to the International version of ICD-codes in its 8<sup>th</sup>, 9<sup>th</sup>, or 10<sup>th</sup> revision.

<sup>c</sup> Consistent with previous suicide research, both certain and undetermined causes were included in the definition of suicidal behavior.<sup>3,4</sup>

**eTable 4.** List of Swedish International Classification of Diseases (ICD) Codes to Collect Records of Autoimmune Diseases From the National Patient Register

| Diagnoses                            | ICD-8 codes                                     | ICD-9 codes | ICD-10 codes    |
|--------------------------------------|-------------------------------------------------|-------------|-----------------|
| Acute disseminated encephalomyelitis | -                                               | -           | G04             |
| Alopecia areata                      | 704.00                                          | 704.A       | L63             |
| Anti-NMDA receptor encephalitis      | -                                               | -           | G13.1           |
| Antiphospholipid syndrome            | -                                               | -           | D68.61          |
| Autoimmune polyglandular syndrome    | 258.10                                          | 258.B       | E31.0           |
| Behçet's disease                     | 136.07                                          | 136.B       | M35.2           |
| Bullous pemphigoid                   | 694.02                                          | 694.F       | L12.0           |
| Celiac disease                       | 269.10                                          | 579.A       | K90.0           |
| Churg-Strauss syndrome               | -                                               | -           | M30.1           |
| Crohn's disease                      | 563.00                                          | 555         | K50             |
| Dermatomyositis                      | 716.00                                          | 710.D       | M33.90          |
| Graves' disease                      | 242.00                                          | 242.A       | E05.0           |
| Guillain-Barré syndrome              | 354.01                                          | 357.A       | G61.0           |
| Hashimoto's thyroiditis              | 245.03                                          | 245.C       | E06.3           |
| Henoch-Schonlein purpura             | 287.00                                          | 287.A       | D69.0           |
| Idiopathic thrombocytopenic purpura  | 287.10 / 446.38                                 | 287.D       | D69.3           |
| IgA nephropathy                      | 580 /582                                        | 580 /582    | N00/N01/N03/N05 |
| Kawasaki                             | -                                               | 446.1       | M30.3           |
| Microscopic polyangiitis             | -                                               | -           | M31.7           |
| Mixed connective tissue disease      | 734.91                                          | 710.W       | M35.1           |
| Multiple sclerosis                   | 340                                             | 340         | G35             |
| Myasthenia gravis                    | 733.00                                          | 358.A       | G70.0           |
| Pemphigus vulgaris                   | 694                                             | 694.E       | L10.0           |
| Polymyalgia rheumatica               | -                                               | 725         | M35.3           |
| Polyarteritis nodosa                 | 446.09                                          | 446.0       | M30.0           |
| Primary biliary cirrhosis            | 571.90                                          | 571.F       | K74.3           |
| Psoriasis vulgaris                   | 696.10 / 696.19-23                              | 696         | L40             |
| Rheumatic fever                      | 390/391                                         | 390/391     | I00/I01         |
| Rheumatic fever with chorea          | 392                                             | 392         | I02             |
| Rheumatoid arthritis                 | 712.00 / 712.10/<br>712.19 / 712.39 /<br>712.59 | 714.A       | M06             |
| Scarlet fever                        | 034.1                                           | 034.1       | A38.9           |
| Scleroderma (systemic sclerosis)     | 734.0 / 734.01 / 734.09                         | 710.B       | M34             |
| Sjögren's syndrome                   | 734.90                                          | 710.C       | M35.0           |
| Systemic Lupus Erythematosus         | 734.10                                          | 710.A       | M32             |
| Temporal arteritis                   | 446.30                                          | 446.F       | M31.5           |
| Thrombotic thrombocytopenic purpura  | 446.40                                          | 446.G       | M31.1           |
| Type 1 diabetes mellitus             | -                                               | -           | E10.9           |
| Ulcerative colitis                   | 563.10                                          | 556         | K51             |
| Vitiligo                             | 709.05                                          | 709.A       | L80             |
| Wegener's granulomatosis             | 446.20                                          | 446.E       | M31.3           |

**eTable 5. Risk of Psychiatric Disorders and Suicidal Behavior in Offspring of Fathers With Primary Immunodeficiencies**

|                                                    | Offspring of fathers with<br>PID n=2 594 | Offspring of fathers without<br>PID n= 4 286 899 | IRR (95% CI)<br>Model 1 | IRR (95% CI)<br>Model 2 | IRR (95% CI)<br>Model 3 |
|----------------------------------------------------|------------------------------------------|--------------------------------------------------|-------------------------|-------------------------|-------------------------|
| Any psychiatric disorder                           | 363 (13.99)                              | 545 224 (12.72)                                  | 1.10 (1.00-1.21)        | 1.05 (0.96-1.16)        | 1.03 (0.94-1.14)        |
| Obsessive-compulsive disorder                      | 14 (0.54)                                | 24 136 (0.56)                                    | 0.95 (0.57-1.61)        | 0.91 (0.54-1.54)        | 0.90 (0.53-1.52)        |
| Attention-deficit/hyperactivity disorder           | 76 (2.93)                                | 106 306 (2.48)                                   | 1.35 (1.08-1.68)        | 1.23 (0.99-1.53)        | 1.20 (0.96-1.49)        |
| Autism spectrum disorders                          | 26 (1.00)                                | 39 788 (0.93)                                    | 1.21 (0.82-1.77)        | 1.12 (0.76-1.64)        | 1.09 (0.74-1.60)        |
| Schizophrenia and other psychotic disorders        | 27 (1.04)                                | 36 345 (0.85)                                    | 1.12 (0.77-1.62)        | 1.07 (0.73-1.55)        | 1.07 (0.73-1.55)        |
| Bipolar disorders                                  | 32 (1.23)                                | 31 385 (0.73)                                    | 1.58 (1.12-2.23)        | 1.51 (1.07-2.13)        | 1.50 (1.06-2.11)        |
| Major depression disorder and other mood disorders | 135 (5.20)                               | 203 516 (4.75)                                   | 1.05 (0.90-1.24)        | 1.01 (0.86-1.19)        | 1.00 (0.85-1.17)        |
| Anxiety and stress-related disorders               | 179 (6.90)                               | 257 885 (6.02)                                   | 1.11 (0.97-1.28)        | 1.07 (0.93-1.23)        | 1.05 (0.91-1.21)        |
| Eating disorders                                   | 26 (1.00)                                | 32 707 (0.76)                                    | 1.36 (0.93-1.99)        | 1.33 (0.91-1.94)        | 1.31 (0.90-1.92)        |
| Substance use disorders                            | 97 (3.74)                                | 163 887 (3.82)                                   | 0.96 (0.79-1.16)        | 0.91 (0.75-1.10)        | 0.90 (0.74-1.09)        |
| Any suicidal behavior                              | 97 (3.74)                                | 132 867 (3.10)                                   | 1.17 (0.96-1.42)        | 1.12 (0.92-1.36)        | 1.10 (0.91-1.34)        |
| Suicide attempt                                    | 93 (3.59)                                | 125 533 (2.93)                                   | 1.19 (0.97-1.45)        | 1.14 (0.93-1.39)        | 1.12 (0.92-1.37)        |
| Death by suicide                                   | 8 (0.31)                                 | 10 573 (0.25)                                    | 1.12 (0.56-2.23)        | 1.07 (0.53-2.13)        | 1.07 (0.53-2.13)        |

Note: Significant IRRs are marked in bold.

Tourette syndrome/ chronic tic disorders are not reported separately due to small numbers.

Model 1: Adjusted by parental birth year and offspring sex and birth year.

Model 2: Adjusted by parental birth year and offspring sex and birth year, parental any psychiatric disorders or suicidal behavior.

Model 3: Adjusted by parental birth year and offspring sex and birth year, parental any psychiatric disorders or suicidal behavior, and any autoimmune diseases in parents.

Total numbers and percentage of the specific outcomes may not sum up to that of the combined outcomes as the study participants may have more than one specific outcome.

Abbreviations: PID, primary immunodeficiencies; IRR, incidence rate ratio; CI, confidence intervals.



**eTable 6.** Risk of Psychiatric Disorders and Suicidal Behavior in Offspring of Mothers With Primary Immunodeficiencies in a Sub-cohort of Individuals Born in 1973 or Later

|                                                    | Offspring of mothers with PID n=2 835 | Offspring of mothers without PID n= 3 135 778 | IRR (95% CI) Model 1 | IRR (95% CI) Model 2 | IRR (95% CI) Model 3 |
|----------------------------------------------------|---------------------------------------|-----------------------------------------------|----------------------|----------------------|----------------------|
| Any psychiatric disorder                           | 495 (17.46)                           | 403 783 (12.88)                               | 1.33(1.23-1.44)      | 1.18(1.09-1.28)      | 1.16(1.07-1.26)      |
| Obsessive-compulsive disorder                      | 26 (0.92)                             | 19 772 (0.63)                                 | 1.38(0.94-2.02)      | 1.23(0.84-1.81)      | 1.22(0.83-1.78)      |
| Attention-deficit/hyperactivity disorder           | 119 (4.20)                            | 94 843 (3.02)                                 | 1.57(1.31-1.86)      | 1.30(1.10-1.55)      | 1.26(1.06-1.50)      |
| Autism spectrum disorders                          | 55 (1.94)                             | 36 581 (1.17)                                 | 1.82(1.40-2.36)      | 1.58(1.22-2.05)      | 1.54(1.18-2.00)      |
| Schizophrenia and other psychotic disorders        | 25 (0.88)                             | 19 456 (0.62)                                 | 1.25(0.84-1.84)      | 1.05(0.71-1.56)      | 1.05(0.71-1.56)      |
| Bipolar disorders                                  | 35 (1.23)                             | 20 079 (0.64)                                 | 1.74(1.25-2.42)      | 1.47(1.06-2.05)      | 1.46(1.05-2.02)      |
| Major depression disorder and other mood disorders | 183 (6.46)                            | 142 541 (4.55)                                | 1.32(1.15-1.52)      | 1.16(1.01-1.33)      | 1.14(0.99-1.31)      |
| Anxiety and stress-related disorders               | 235 (8.29)                            | 183 543 (5.85)                                | 1.33(1.18-1.50)      | 1.17(1.03-1.31)      | 1.14(1.01-1.29)      |
| Eating disorders                                   | 34 (1.20)                             | 28 564 (0.91)                                 | 1.30(0.93-1.81)      | 1.23(0.88-1.71)      | 1.22(0.87-1.70)      |
| Substance use disorders                            | 148 (5.22)                            | 114 281 (3.64)                                | 1.36(1.17-1.60)      | 1.17(1.00-1.37)      | 1.16(0.99-1.35)      |
| Any suicidal behavior                              | 112 (3.95)                            | 88 737 (2.83)                                 | 1.32(1.11-1.59)      | 1.14(0.95-1.37)      | 1.13(0.94-1.35)      |
| Suicide attempt                                    | 108 (3.81)                            | 85 646 (2.73)                                 | 1.33(1.10-1.60)      | 1.15(0.96-1.38)      | 1.13(0.94-1.36)      |
| Death by suicide                                   | 5 (0.18)                              | 4 459 (0.14)                                  | 1.06(0.44-2.55)      | 0.86(0.36-2.05)      | 0.86(0.36-2.06)      |

Note: Significant IRRs are marked in bold.

Tourette syndrome/ chronic tic disorders are not reported separately due to small numbers.

Model 1: Adjusted by parental birth year and offspring sex and birth year.

Model 2: Adjusted by parental birth year and offspring sex and birth year, parental any psychiatric disorders or suicidal behavior.

Model 3: Adjusted by parental birth year and offspring sex and birth year, parental any psychiatric disorders or suicidal behavior, and any autoimmune diseases in parents.

Total numbers and percentage of the specific outcomes may not sum up to that of the combined outcomes as the study participants may have more than one specific outcome.

Abbreviations: PID, primary immunodeficiencies; IRR, incidence rate ratio; CI, confidence intervals.

**eTable 7.** Risk of Psychiatric Disorders and Suicidal Behavior in Offspring of Fathers With Primary Immunodeficiencies in a Sub-cohort of Individuals Born in 1973 or Later

|                                                    | Offspring of fathers with PID n=1 742 | Offspring of fathers without PID n= 3 135 778 | IRR (95% CI) Model 1 | IRR (95% CI) Model 2 | IRR (95% CI) Model 3 |
|----------------------------------------------------|---------------------------------------|-----------------------------------------------|----------------------|----------------------|----------------------|
| Any psychiatric disorder                           | 261 (14.98)                           | 403 783 (12.88)                               | 1.15(1.03-1.29)      | 1.08(0.97-1.21)      | 1.06(0.95-1.19)      |
| Attention-deficit/hyperactivity disorder           | 69 (3.96)                             | 94 843 (3.02)                                 | 1.44(1.14-1.81)      | 1.29(1.03-1.63)      | 1.26(1.00-1.58)      |
| Autism spectrum disorders                          | 22 (1.26)                             | 36 581 (1.17)                                 | 1.15(0.76-1.74)      | 1.05(0.70-1.60)      | 1.03(0.68-1.56)      |
| Schizophrenia and other psychotic disorders        | 17 (0.98)                             | 19 456 (0.62)                                 | 1.40(0.87-2.24)      | 1.31(0.81-2.09)      | 1.31(0.81-2.09)      |
| Bipolar disorders                                  | 23 (1.32)                             | 20 079 (0.64)                                 | 1.90(1.26-2.85)      | 1.77(1.18-2.65)      | 1.74(1.16-2.62)      |
| Major depression disorder and other mood disorders | 93 (5.34)                             | 142 541 (4.55)                                | 1.11(0.91-1.35)      | 1.05(0.86-1.27)      | 1.03(0.84-1.25)      |
| Anxiety and stress-related disorders               | 126 (7.23)                            | 183 543 (5.85)                                | 1.18(1.00-1.39)      | 1.11(0.94-1.31)      | 1.08(0.92-1.28)      |
| Eating disorders                                   | 24 (1.38)                             | 28 564 (0.91)                                 | 1.51(1.01-2.24)      | 1.46(0.98-2.17)      | 1.45(0.97-2.15)      |
| Substance use disorders                            | 65 (3.73)                             | 114 281 (3.64)                                | 0.99(0.78-1.25)      | 0.92(0.73-1.17)      | 0.91(0.72-1.16)      |
| Any suicidal behavior                              | 61 (3.50)                             | 88 737 (2.83)                                 | 1.19(0.93-1.52)      | 1.13(0.88-1.44)      | 1.12(0.87-1.43)      |
| Suicide attempt                                    | 60 (3.44)                             | 85 646 (2.73)                                 | 1.22(0.95-1.56)      | 1.16(0.90-1.48)      | 1.14(0.89-1.46)      |

*Note:* Significant IRRs are marked in bold.

Tourette syndrome/ chronic tic disorders and death by suicide are not reported separately due to small numbers.

Model 1: Adjusted by parental birth year and offspring sex and birth year.

Model 2: Adjusted by parental birth year and offspring sex and birth year, parental any psychiatric disorders or suicidal behavior.

Model 3: Adjusted by parental birth year and offspring sex and birth year, parental any psychiatric disorders or suicidal behavior, and any autoimmune diseases in parents.

Total numbers and percentage of the specific outcomes may not sum up to that of the combined outcomes as the study participants may have more than one specific outcome.

Abbreviations: PID, primary immunodeficiencies; IRR, incidence rate ratio; CI, confidence intervals.

**eTable 8.** Risk of Psychiatric Disorders and Suicidal Behavior in Offspring of Fathers With Only Primary Immunodeficiencies, Only Autoimmune Disease, or Both

|                                                    | Offspring of fathers without PID or AD | Offspring of fathers with ONLY PID |                  | Offspring of fathers with ONLY AD |                  | Offspring of fathers with both PID and AD |                  |
|----------------------------------------------------|----------------------------------------|------------------------------------|------------------|-----------------------------------|------------------|-------------------------------------------|------------------|
|                                                    | n=3 540 769                            | n=1 665                            | IRR (95% CI)     | N=746 130                         | IRR (95% CI)     | N=929                                     | IRR (95% CI)     |
| Any psychiatric disorder                           | 438 320 (12.38)                        | 226 (13.57)                        | 1.02 (0.91-1.14) | 106 904 (14.33)                   | 1.05 (1.04-1.06) | 137 (14.75)                               | 1.16 (0.98-1.37) |
| Obsessive-compulsive disorder                      | 19 507 (0.55)                          | 8 (0.48)                           | 0.91 (0.49-1.68) | 4 629 (0.62)                      | 1.02 (0.97-1.06) | 6 (0.65)                                  | 0.94 (0.35-2.49) |
| Attention-deficit/hyperactivity disorder           | 86 696 (2.45)                          | 45 (2.70)                          | 1.09 (0.83-1.43) | 19 610 (2.63)                     | 1.10 (1.07-1.12) | 31 (3.34)                                 | 1.66 (1.16-2.38) |
| Autism spectrum disorders                          | 32 641 (0.92)                          | 20 (1.20)                          | 1.23 (0.80-1.88) | 7 147 (0.96)                      | 1.07 (1.03-1.11) | 6 (0.65)                                  | 0.83 (0.35-1.99) |
| Schizophrenia and other psychotic disorders        | 28 813 (0.81)                          | 19 (1.14)                          | 1.11 (0.72-1.72) | 7 532 (1.01)                      | 0.97 (0.94-1.01) | 8 (0.86)                                  | 0.95 (0.45-2.00) |
| Bipolar disorders                                  | 24 844 (0.70)                          | 18 (1.08)                          | 1.26 (0.81-1.97) | 6 541 (0.88)                      | 0.99 (0.96-1.03) | 14 (1.51)                                 | 2.13 (1.24-3.65) |
| Major depression disorder and other mood disorders | 161 527 (4.56)                         | 91 (5.47)                          | 1.06 (0.88-1.28) | 41 989 (5.63)                     | 1.06 (1.05-1.08) | 44 (4.74)                                 | 0.93 (0.68-1.28) |
| Anxiety and stress-related disorders               | 205 341 (5.80)                         | 104 (6.25)                         | 0.98 (0.82-1.17) | 52 544 (7.04)                     | 1.06 (1.04-1.07) | 75 (8.07)                                 | 1.31 (1.03-1.66) |
| Eating disorders                                   | 26 914 (0.76)                          | 13 (0.78)                          | 1.13 (0.69-1.83) | 5 793 (0.78)                      | 1.01 (0.97-1.05) | 13 (1.40)                                 | 1.85 (1.00-3.41) |
| Substance use disorders                            | 130 863 (3.70)                         | 59 (3.54)                          | 0.89 (0.71-1.13) | 33 024 (4.43)                     | 1.03 (1.02-1.05) | 38 (4.09)                                 | 0.96 (0.67-1.37) |
| Any suicidal behavior                              | 105 909 (2.99)                         | 56 (3.36)                          | 1.08 (0.86-1.37) | 26 958 (3.61)                     | 1.04 (1.02-1.06) | 41 (4.41)                                 | 1.22 (0.87-1.73) |
| Suicide attempt                                    | 100 130 (2.83)                         | 53 (3.18)                          | 1.08 (0.85-1.38) | 25 403 (3.40)                     | 1.04 (1.03-1.06) | 40 (4.31)                                 | 1.31 (0.92-1.85) |

Note: Significant IRRs are marked in bold.

Tourette syndrome or chronic tic disorders and death by suicide are not reported as a separate entity due to small numbers.

Total numbers and percentage of the specific outcomes may not sum up to that of the combined outcomes as the study participants may have more than one specific outcome.

Abbreviations: PID, primary immunodeficiencies; AD, autoimmune diseases; IRR, incidence rate ratio; CI, confidence intervals.

**eTable 9.** Risk of Psychiatric Disorders and Suicidal Behavior in Offspring of Mothers With Primary Immunodeficiencies, Excluding Offspring With Own Record of Primary Immunodeficiency

|                                                    | Offspring of mothers with PID n=4 577 | Offspring of mothers without PID n=4 284 229 | IRR (95% CI) Model 1 | IRR (95% CI) Model 2 | IRR (95% CI) Model 3 |
|----------------------------------------------------|---------------------------------------|----------------------------------------------|----------------------|----------------------|----------------------|
| Any psychiatric disorder                           | 785 (17.15)                           | 544 592 (12.71)                              | 1.33 (1.25-1.42)     | 1.19 (1.12-1.27)     | 1.18 (1.10-1.25)     |
| Obsessive-compulsive disorder                      | 38 (0.83)                             | 24 099 (0.56)                                | 1.50 (1.09-2.05)     | 1.35 (0.98-1.85)     | 1.33 (0.97-1.82)     |
| Tourette and chronic tic disorders                 | 6 (0.13)                              | 4 938 (0.12)                                 | 1.45 (0.65-3.23)     | 1.24 (0.56-2.76)     | 1.17 (0.53-2.61)     |
| Attention-deficit/hyperactivity disorder           | 146 (3.19)                            | 106 185 (2.48)                               | 1.59 (1.36-1.86)     | 1.34 (1.14-1.57)     | 1.30 (1.11-1.52)     |
| Autism spectrum disorders                          | 59 (1.29)                             | 39 720 (0.93)                                | 1.71 (1.33-2.20)     | 1.50 (1.16-1.93)     | 1.46 (1.13-1.88)     |
| Schizophrenia and other psychotic disorders        | 63 (1.38)                             | 36 303 (0.85)                                | 1.36 (1.06-1.73)     | 1.18 (0.92-1.50)     | 1.18 (0.92-1.50)     |
| Bipolar disorders                                  | 77 (1.68)                             | 31 346 (0.73)                                | 2.04 (1.63-2.54)     | 1.77 (1.42-2.20)     | 1.75 (1.40-2.18)     |
| Major depression disorder and other mood disorders | 328 (7.17)                            | 203 249 (4.74)                               | 1.41 (1.27-1.56)     | 1.25 (1.13-1.39)     | 1.23 (1.11-1.37)     |
| Anxiety and stress-related disorders               | 386 (8.43)                            | 257 537 (6.01)                               | 1.32 (1.20-1.45)     | 1.18 (1.07-1.29)     | 1.16 (1.05-1.27)     |
| Eating disorders                                   | 40 (0.87)                             | 32 662 (0.76)                                | 1.24 (0.91-1.68)     | 1.17 (0.86-1.59)     | 1.16 (0.85-1.57)     |
| Substance use disorders                            | 255 (5.57)                            | 163 731 (3.82)                               | 1.36 (1.21-1.54)     | 1.18 (1.05-1.33)     | 1.17 (1.04-1.32)     |
| Any suicidal behavior                              | 213 (4.65)                            | 132 721 (3.10)                               | 1.38 (1.21-1.58)     | 1.21 (1.06-1.38)     | 1.20 (1.05-1.36)     |
| Suicide attempt                                    | 199 (4.35)                            | 125 390 (2.93)                               | 1.38 (1.21-1.58)     | 1.21 (1.06-1.39)     | 1.19 (1.04-1.37)     |
| Death by suicide                                   | 16 (0.35)                             | 10 566 (0.25)                                | 1.12 (0.68-1.82)     | 0.95 (0.58-1.55)     | 0.95 (0.58-1.56)     |

Note: Significant IRRs are marked in bold.

Model 1: Adjusted by parental birth year and offspring sex and birth year.

Model 2: Adjusted by parental birth year and offspring sex and birth year, parental any psychiatric disorders or suicidal behavior.

Model 3: Adjusted by parental birth year and offspring sex and birth year, parental any psychiatric disorders or suicidal behavior, and any autoimmune diseases in parents.

Total numbers and percentage of the specific outcomes may not sum up to that of the combined outcomes as the study participants may have more than one specific outcome.

Abbreviations: PID, primary immunodeficiencies; IRR, incidence rate ratio; CI, confidence intervals.

**eTable 10.** Risk of Psychiatric Disorders and Suicidal Behavior in Offspring of Mothers With Primary Immunodeficiencies, Excluding Offspring With Own Record of Autoimmune Disease

|                                                    | Offspring of mothers with PID n=4 280 | Offspring of mothers without PID n=4 041 410 | IRR (95% CI) Model 1 | IRR (95% CI) Model 2 | IRR (95% CI) Model 3 |
|----------------------------------------------------|---------------------------------------|----------------------------------------------|----------------------|----------------------|----------------------|
| Any psychiatric disorder                           | 712 (16.64)                           | 500 056 (12.37)                              | 1.33 (1.25-1.42)     | 1.19 (1.12-1.27)     | 1.18 (1.10-1.26)     |
| Obsessive-compulsive disorder                      | 35 (0.82)                             | 22 161 (0.55)                                | 1.51 (1.09-2.10)     | 1.36 (0.98-1.89)     | 1.34 (0.97-1.87)     |
| Tourette and chronic tic disorders                 | 5 (0.12)                              | 4 593 (0.11)                                 | 1.31 (0.55-3.15)     | 1.12 (0.47-2.69)     | 1.06 (0.44-2.53)     |
| Attention-deficit/hyperactivity disorder           | 136 (3.18)                            | 98 781 (2.44)                                | 1.62 (1.37-1.91)     | 1.35 (1.15-1.59)     | 1.32 (1.12-1.55)     |
| Autism spectrum disorders                          | 55 (1.29)                             | 36 788 (0.91)                                | 1.74 (1.34-2.26)     | 1.52 (1.17-1.97)     | 1.48 (1.14-1.92)     |
| Schizophrenia and other psychotic disorders        | 55 (1.29)                             | 33 277 (0.82)                                | 1.30 (1.00-1.69)     | 1.13 (0.87-1.47)     | 1.13 (0.87-1.47)     |
| Bipolar disorders                                  | 69 (1.61)                             | 28 388 (0.70)                                | 2.04 (1.61-2.57)     | 1.77 (1.40-2.23)     | 1.75 (1.39-2.21)     |
| Major depression disorder and other mood disorders | 291 (6.80)                            | 184 010 (4.55)                               | 1.40 (1.25-1.56)     | 1.24 (1.11-1.39)     | 1.22 (1.10-1.37)     |
| Anxiety and stress-related disorders               | 345 (8.06)                            | 234 680 (5.81)                               | 1.31 (1.19-1.45)     | 1.17 (1.06-1.29)     | 1.15 (1.04-1.27)     |
| Eating disorders                                   | 36 (0.84)                             | 29 645 (0.73)                                | 1.24 (0.90-1.72)     | 1.17 (0.85-1.62)     | 1.16 (0.84-1.61)     |
| Substance use disorders                            | 239 (5.58)                            | 150 374 (3.72)                               | 1.41 (1.24-1.59)     | 1.22 (1.08-1.38)     | 1.21 (1.07-1.36)     |
| Any suicidal behavior                              | 199 (4.65)                            | 121 550 (3.01)                               | 1.43 (1.25-1.63)     | 1.25 (1.09-1.43)     | 1.24 (1.08-1.42)     |
| Suicide attempt                                    | 186 (4.35)                            | 114 529 (2.83)                               | 1.43 (1.24-1.65)     | 1.25 (1.09-1.44)     | 1.24 (1.08-1.43)     |
| Death by suicide                                   | 13 (0.30)                             | 10 015 (0.25)                                | 0.96 (0.56-1.66)     | 0.82 (0.48-1.42)     | 0.82 (0.48-1.42)     |

Note: Significant IRRs are marked in bold.

Model 1: Adjusted by parental birth year and offspring sex and birth year.

Model 2: Adjusted by parental birth year and offspring sex and birth year, parental any psychiatric disorders or suicidal behavior.

Model 3: Adjusted by parental birth year and offspring sex and birth year, parental any psychiatric disorders or suicidal behavior, and any autoimmune diseases in parents.

Total numbers and percentage of the specific outcomes may not sum up to that of the combined outcomes as the study participants may have more than one specific outcome.

Abbreviations: PID, primary immunodeficiencies; IRR, incidence rate ratio; CI, confidence intervals.

**eTable 11.** Risk of Psychiatric Disorders and Suicidal Behavior in Offspring of Mothers With Primary Immunodeficiencies, Excluding Offspring With Own Record of Primary Immunodeficiency and Autoimmune Disease

|                                                    | Offspring of mothers with PID n=4 205 | Offspring of mothers without PID n=4 039 480 | IRR (95% CI) Model 1 | IRR (95% CI) Model 2 | IRR (95% CI) Model 3 |
|----------------------------------------------------|---------------------------------------|----------------------------------------------|----------------------|----------------------|----------------------|
| Any psychiatric disorder                           | 700 (16.65)                           | 499 624 (12.37)                              | 1.33 (1.25-1.43)     | 1.19 (1.12-1.28)     | 1.18 (1.10-1.26)     |
| Obsessive-compulsive disorder                      | 34 (0.81)                             | 22 132 (0.55)                                | 1.49 (1.07-2.09)     | 1.35 (0.96-1.88)     | 1.33 (0.95-1.86)     |
| Tourette and chronic tic disorders                 | 5 (0.12)                              | 4 590 (0.11)                                 | 1.35 (0.56-3.23)     | 1.15 (0.48-2.76)     | 1.08 (0.45-2.60)     |
| Attention-deficit/hyperactivity disorder           | 132 (3.14)                            | 98 693 (2.44)                                | 1.61 (1.36-1.90)     | 1.34 (1.14-1.59)     | 1.31 (1.11-1.54)     |
| Autism spectrum disorders                          | 54 (1.28)                             | 36 740 (0.91)                                | 1.75 (1.34-2.27)     | 1.52 (1.17-1.98)     | 1.49 (1.14-1.93)     |
| Schizophrenia and other psychotic disorders        | 55 (1.31)                             | 33 243 (0.82)                                | 1.32 (1.02-1.72)     | 1.15 (0.88-1.49)     | 1.15 (0.88-1.49)     |
| Bipolar disorders                                  | 69 (1.64)                             | 28 359 (0.70)                                | 2.07 (1.64-2.62)     | 1.80 (1.42-2.27)     | 1.78 (1.41-2.25)     |
| Major depression disorder and other mood disorders | 287 (6.83)                            | 183 839 (4.55)                               | 1.40 (1.25-1.56)     | 1.25 (1.12-1.39)     | 1.23 (1.10-1.37)     |
| Anxiety and stress-related disorders               | 342 (8.13)                            | 234 451 (5.80)                               | 1.32 (1.20-1.46)     | 1.18 (1.06-1.30)     | 1.16 (1.05-1.28)     |
| Eating disorders                                   | 35 (0.83)                             | 29 617 (0.73)                                | 1.23 (0.89-1.71)     | 1.16 (0.84-1.61)     | 1.15 (0.83-1.60)     |
| Substance use disorders                            | 237 (5.64)                            | 150 261 (3.72)                               | 1.42 (1.25-1.61)     | 1.23 (1.09-1.39)     | 1.22 (1.08-1.38)     |
| Any suicidal behavior                              | 195 (4.64)                            | 121 454 (3.01)                               | 1.42 (1.24-1.63)     | 1.25 (1.09-1.43)     | 1.23 (1.08-1.41)     |
| Suicide attempt                                    | 182 (4.33)                            | 114 435 (2.83)                               | 1.43 (1.24-1.64)     | 1.25 (1.09-1.44)     | 1.24 (1.07-1.42)     |
| Death by suicide                                   | 13 (0.31)                             | 10 009 (0.25)                                | 0.98 (0.57-1.68)     | 0.84 (0.49-1.44)     | 0.84 (0.49-1.44)     |

Note: Significant IRRs are marked in bold.

Model 1: Adjusted by parental birth year and offspring sex and birth year.

Model 2: Adjusted by parental birth year and offspring sex and birth year, parental any psychiatric disorders or suicidal behavior.

Model 3: Adjusted by parental birth year and offspring sex and birth year, parental any psychiatric disorders or suicidal behavior, and any autoimmune diseases in parents.

Total numbers and percentage of the specific outcomes may not sum up to that of the combined outcomes as the study participants may have more than one specific outcome.

Abbreviations: PID, primary immunodeficiencies; IRR, incidence rate ratio; CI, confidence intervals.

**eTable 12.** Risk of Psychiatric Disorders and Suicidal Behavior in Offspring of Fathers With Primary Immunodeficiencies, Excluding Offspring With Own Record of Primary Immunodeficiency

|                                                    | Offspring of fathers with PID n=2 565 | Offspring of fathers without PID n=4 284 229 | IRR (95% CI) Model 1 | IRR (95% CI) Model 2 | IRR (95% CI) Model 3 |
|----------------------------------------------------|---------------------------------------|----------------------------------------------|----------------------|----------------------|----------------------|
| Any psychiatric disorder                           | 361 (14.07)                           | 544 592 (12.71)                              | 1.10 (1.00-1.22)     | 1.06 (0.96-1.16)     | 1.04 (0.95-1.14)     |
| Obsessive-compulsive disorder                      | 14 (0.55)                             | 24 099 (0.56)                                | 0.97 (0.57-1.63)     | 0.92 (0.55-1.56)     | 0.91 (0.54-1.54)     |
| Attention-deficit/hyperactivity disorder           | 76 (2.96)                             | 106 185 (2.48)                               | 1.37 (1.10-1.70)     | 1.24 (1.00-1.55)     | 1.21 (0.97-1.50)     |
| Autism spectrum disorders                          | 26 (1.01)                             | 39 720 (0.93)                                | 1.22 (0.83-1.79)     | 1.13 (0.77-1.66)     | 1.10 (0.75-1.62)     |
| Schizophrenia and other psychotic disorders        | 27 (1.05)                             | 36 303 (0.85)                                | 1.13 (0.77-1.64)     | 1.08 (0.74-1.57)     | 1.08 (0.74-1.57)     |
| Bipolar disorders                                  | 32 (1.25)                             | 31 346 (0.73)                                | 1.60 (1.13-2.26)     | 1.53 (1.08-2.16)     | 1.51 (1.07-2.14)     |
| Major depression disorder and other mood disorders | 134 (5.22)                            | 203 249 (4.74)                               | 1.06 (0.90-1.25)     | 1.02 (0.87-1.20)     | 1.00 (0.85-1.18)     |
| Anxiety and stress-related disorders               | 178 (6.94)                            | 257 537 (6.01)                               | 1.12 (0.97-1.29)     | 1.08 (0.93-1.24)     | 1.06 (0.92-1.22)     |
| Eating disorders                                   | 26 (1.01)                             | 32 662 (0.76)                                | 1.38 (0.94-2.02)     | 1.35 (0.92-1.97)     | 1.33 (0.91-1.95)     |
| Substance use disorders                            | 97 (3.78)                             | 163 731 (3.82)                               | 0.97 (0.80-1.17)     | 0.92 (0.75-1.11)     | 0.91 (0.75-1.10)     |
| Any suicidal behavior                              | 97 (3.78)                             | 132 721 (3.10)                               | 1.18 (0.97-1.43)     | 1.13 (0.93-1.37)     | 1.12 (0.92-1.36)     |
| Suicide attempt                                    | 93 (3.63)                             | 125 390 (2.93)                               | 1.20 (0.99-1.47)     | 1.15 (0.94-1.40)     | 1.14 (0.93-1.39)     |
| Death by suicide                                   | 8 (0.31)                              | 10 566 (0.25)                                | 1.13 (0.57-2.25)     | 1.07 (0.54-2.14)     | 1.07 (0.54-2.15)     |

Note: Significant IRRs are marked in bold.

Tourette syndrome or chronic tic disorders are not reported separately due to small numbers.

Model 1: Adjusted by parental birth year and offspring sex and birth year.

Model 2: Adjusted by parental birth year and offspring sex and birth year, parental any psychiatric disorders or suicidal behavior.

Model 3: Adjusted by parental birth year and offspring sex and birth year, parental any psychiatric disorders or suicidal behavior, and any autoimmune diseases in parents.

Total numbers and percentage of the specific outcomes may not sum up to that of the combined outcomes as the study participants may have more than one specific outcome.

Abbreviations: PID, primary immunodeficiencies; IRR, incidence rate ratio; CI, confidence intervals.

**eTable 13.** Risk of Psychiatric Disorders and Suicidal Behavior in Offspring of Fathers With Primary Immunodeficiencies, Excluding Offspring With Own Record of Autoimmune Disease

|                                                    | Offspring of fathers with PID n=2 405 | Offspring of fathers without PID n=4 041 410 | IRR (95% CI) Model 1 | IRR (95% CI) Model 2 | IRR (95% CI) Model 3 |
|----------------------------------------------------|---------------------------------------|----------------------------------------------|----------------------|----------------------|----------------------|
| Any psychiatric disorder                           | 319 (13.26)                           | 500 056 (12.37)                              | 1.07 (0.97-1.18)     | 1.02 (0.92-1.13)     | 1.01 (0.91-1.12)     |
| Obsessive-compulsive disorder                      | 14 (0.58)                             | 22 161 (0.55)                                | 1.06 (0.63-1.78)     | 1.01 (0.60-1.70)     | 1.00 (0.59-1.68)     |
| Attention-deficit/hyperactivity disorder           | 65 (2.70)                             | 98 781 (2.44)                                | 1.27 (1.00-1.62)     | 1.16 (0.91-1.47)     | 1.13 (0.89-1.43)     |
| Autism spectrum disorders                          | 24 (1.00)                             | 36 788 (0.91)                                | 1.23 (0.83-1.83)     | 1.14 (0.77-1.70)     | 1.12 (0.75-1.66)     |
| Schizophrenia and other psychotic disorders        | 26 (1.08)                             | 33 277 (0.82)                                | 1.18 (0.81-1.73)     | 1.13 (0.77-1.65)     | 1.13 (0.77-1.65)     |
| Bipolar disorders                                  | 25 (1.04)                             | 28 388 (0.70)                                | 1.38 (0.94-2.05)     | 1.32 (0.89-1.95)     | 1.31 (0.89-1.93)     |
| Major depression disorder and other mood disorders | 115 (4.78)                            | 184 010 (4.55)                               | 1.01 (0.85-1.21)     | 0.97 (0.81-1.16)     | 0.96 (0.80-1.14)     |
| Anxiety and stress-related disorders               | 157 (6.53)                            | 234 680 (5.81)                               | 1.09 (0.94-1.27)     | 1.04 (0.90-1.21)     | 1.03 (0.89-1.20)     |
| Eating disorders                                   | 20 (0.83)                             | 29 645 (0.73)                                | 1.18 (0.76-1.82)     | 1.15 (0.74-1.78)     | 1.14 (0.74-1.76)     |
| Substance use disorders                            | 90 (3.74)                             | 150 374 (3.72)                               | 0.98 (0.80-1.20)     | 0.93 (0.76-1.13)     | 0.92 (0.75-1.12)     |
| Any suicidal behavior                              | 89 (3.70)                             | 121 550 (3.01)                               | 1.19 (0.97-1.45)     | 1.13 (0.92-1.39)     | 1.12 (0.92-1.37)     |
| Suicide attempt                                    | 85 (3.53)                             | 114 529 (2.83)                               | 1.21 (0.98-1.49)     | 1.15 (0.94-1.42)     | 1.14 (0.93-1.41)     |
| Death by suicide                                   | 8 (0.33)                              | 10 015 (0.25)                                | 1.18 (0.59-2.36)     | 1.12 (0.56-2.24)     | 1.12 (0.56-2.24)     |

Note: Significant IRRs are marked in bold.

Tourette syndrome or chronic tic disorders are not reported as a separate entity due to small numbers.

Model 1: Adjusted by parental birth year and offspring sex and birth year.

Model 2: Adjusted by parental birth year and offspring sex and birth year, parental any psychiatric disorders or suicidal behavior.

Model 3: Adjusted by parental birth year and offspring sex and birth year, parental any psychiatric disorders or suicidal behavior, and any autoimmune diseases in parents.

Total numbers and percentage of the specific outcomes may not sum up to that of the combined outcomes as the study participants may have more than one specific outcome.

Abbreviations: PID, primary immunodeficiencies; IRR, incidence rate ratio; CI, confidence intervals.



**eTable 14.** Risk of Psychiatric Disorders and Suicidal Behavior in Offspring of Fathers With Primary Immunodeficiencies, Excluding Offspring With Own Record of Primary Immunodeficiency and Autoimmune Disease

|                                                    | Offspring of fathers with PID n=2 384 | Offspring of fathers without PID n=4 039 480 | IRR (95% CI) Model 1 | IRR (95% CI) Model 2 | IRR (95% CI) Model 3 |
|----------------------------------------------------|---------------------------------------|----------------------------------------------|----------------------|----------------------|----------------------|
| Any psychiatric disorder                           | 317 (13.30)                           | 499 624 (12.37)                              | 1.07 (0.97-1.19)     | 1.02 (0.93-1.13)     | 1.01 (0.91-1.12)     |
| Obsessive-compulsive disorder                      | 14 (0.59)                             | 22 132 (0.55)                                | 1.07 (0.63-1.80)     | 1.02 (0.61-1.72)     | 1.01 (0.60-1.70)     |
| Attention-deficit/hyperactivity disorder           | 65 (2.73)                             | 98 693 (2.44)                                | 1.29 (1.01-1.63)     | 1.17 (0.92-1.48)     | 1.14 (0.90-1.45)     |
| Autism spectrum disorders                          | 24 (1.01)                             | 36 740 (0.91)                                | 1.24 (0.83-1.85)     | 1.15 (0.77-1.72)     | 1.13 (0.76-1.68)     |
| Schizophrenia and other psychotic disorders        | 26 (1.09)                             | 33 243 (0.82)                                | 1.19 (0.81-1.75)     | 1.14 (0.77-1.67)     | 1.14 (0.78-1.67)     |
| Bipolar disorders                                  | 25 (1.05)                             | 28 359 (0.70)                                | 1.40 (0.95-2.07)     | 1.33 (0.90-1.97)     | 1.32 (0.90-1.95)     |
| Major depression disorder and other mood disorders | 114 (4.78)                            | 183 839 (4.55)                               | 1.01 (0.85-1.21)     | 0.97 (0.81-1.16)     | 0.96 (0.80-1.14)     |
| Anxiety and stress-related disorders               | 156 (6.54)                            | 234 451 (5.80)                               | 1.09 (0.94-1.27)     | 1.05 (0.90-1.22)     | 1.03 (0.89-1.20)     |
| Eating disorders                                   | 20 (0.84)                             | 29 617 (0.73)                                | 1.19 (0.77-1.84)     | 1.16 (0.75-1.79)     | 1.15 (0.74-1.78)     |
| Substance use disorders                            | 90 (3.78)                             | 150 261 (3.72)                               | 0.99 (0.81-1.21)     | 0.93 (0.76-1.14)     | 0.93 (0.76-1.13)     |
| Any suicidal behavior                              | 89 (3.73)                             | 121 454 (3.01)                               | 1.20 (0.98-1.47)     | 1.14 (0.93-1.40)     | 1.13 (0.92-1.39)     |
| Suicide attempt                                    | 85 (3.57)                             | 114 435 (2.83)                               | 1.22 (0.99-1.50)     | 1.16 (0.94-1.43)     | 1.15 (0.94-1.42)     |
| Death by suicide                                   | 8 (0.34)                              | 10 009 (0.25)                                | 1.19 (0.59-2.37)     | 1.13 (0.56-2.25)     | 1.13 (0.56-2.25)     |

Note: Significant IRRs are marked in bold.

Tourette syndrome or chronic tic disorders are not reported as a separate entity due to small numbers.

Model 1: Adjusted by parental birth year and offspring sex and birth year.

Model 2: Adjusted by parental birth year and offspring sex and birth year, parental any psychiatric disorders or suicidal behavior.

Model 3: Adjusted by parental birth year and offspring sex and birth year, parental any psychiatric disorders or suicidal behavior, and any autoimmune diseases in parents.

Total numbers and percentage of the specific outcomes may not sum up to that of the combined outcomes as the study participants may have more than one specific outcome.

Abbreviations: PID, primary immunodeficiencies; IRR, incidence rate ratio; CI, confidence intervals.

## eReferences.

- 1 Larsson H, Rydén E, Boman M, Långström N, Lichtenstein P, Landén M. Risk of bipolar disorder and schizophrenia in relatives of people with attention-deficit hyperactivity disorder. *Br J Psychiatry J Ment Sci* 2013; **203**: 103–106.
- 2 Rück C, Larsson KJ, Lind K, Perez-Vigil A, Isomura K, Sariaslan A *et al*. Validity and reliability of chronic tic disorder and obsessive-compulsive disorder diagnoses in the Swedish National Patient Register. *BMJ Open* 2015; **5**: e007520.
- 3 Runeson B, Tidemalm D, Dahlin M, Lichtenstein P, Långström N. Method of attempted suicide as predictor of subsequent successful suicide: national long term cohort study. *BMJ* 2010; **341**: c3222.
- 4 Fernández de la Cruz L, Rydell M, Runeson B, D’Onofrio BM, Brander G, Rück C *et al*. Suicide in obsessive-compulsive disorder: a population-based study of 36 788 Swedish patients. *Mol Psychiatry* 2016. doi:10.1038/mp.2016.115.
