# Supplementary material
Source: PubMed Central journal article supplement (PMC10077106)
Supplement: jamapsychiatry-e224786-s002.pdf [file jamapsychiatry-e224786-s002.pdf]

## Data Sharing Statement

Isung. Association of Primary Immunodeficiencies in Parents With Psychiatric Disorders and Suicidal Behavior in Their Offspring. *JAMA Psychiatry*. Published February 01, 2023.  
doi:10.1001/jamapsychiatry.2022.4786

### Data

**Data available:** No
